# Supplementary material for: Influence of a Polyphenol-Enriched Protein Powder on Exercise-Induced Inflammation and Oxidative Stress in Athletes: A Randomized Trial Using a Metabolomics Approach
Source: PLoS One. 2013 Aug 15;8(8):e72215. doi: 10.1371/journal.pone.0072215 (PMC3744465; doi:10.1371/journal.pone.0072215)
Supplement: Table S1 — Mass spectral data for polyphenolic compounds identified in acidified methanol extract of blueberry SPI. (DOCX) [file pone.0072215.s003.docx]

**Table S1:** Mass spectral data for polyphenolic compounds identified in acidified methanol extract of blueberry SPI.

| **RT,**  GC  **min** | **MS** | **MSn** | **Compound ID a** |
| --- | --- | --- | --- |
| 11.99 | 465 | (465)2 303 | delphinidin galactoside (assigned by RT compared to 12.28 min) |
| 12.28 | 465 | (465)2 303 | delphinidin glucoside |
| 12.69 | 435 | (435)2 303 | delphinidin + pentose (probably arabinoside – MAL work) |
| 12.78 | 449 | (449)2 287 | cyanidin 3-galactoside **b** (assigned by RT compared to 13.08 min) |
| 13.08 | 449 | (449)2 287 | cyanidin 3-glucoside **b** |
| 13.12 | 479 | (479)2 317 | petunidin 3-galactoside (assigned by RT compared to 13.41 min) |
| 13.41 | 479 | (479)2 317 | petunidin 3-glucoside |
| 13.51 | 419 | (419)2 287 | cyanidin + pentose (probably arabinoside – MAL work) |
| 13.86 | 449 | (449)2 317 | petunidin + pentose (probably arabinoside – MAL work) |
| 14.14 | 493 | (493)2 331 | malvidin galactoside (assigned by RT compared to 14.45 min) |
| 14.45 | 493 | (493)2 331 | malvidin glucoside |
| 14.93 | 463 | (463)2 331 | malvidin + pentose (probably arabinoside – MAL work) |
| 15.69 | 355 | (355)2 163; (163)3 145, 135 | **Unknown c** |
| 15.76 | 463 | (463)2 331 | malvidin + pentose (maybe xyloside? since arabinoside appears at 14.93 min) |
| 16.96 | 535 | (535)2 331 | malvidin + acetoyl + hexose (probably 6-acetyl glucoside/galactoside – MAL work) |

**a** Tentative identification based on [M+H]+, MS2 of aglycone and fragment mass of glycoside moiety by comparisons with Wu *et al J. Agric. Food Chem.* **2005**, 53, 2589-2599. **Red Bold** = unidentified compound; **b** Does not appear in TIC but appears in IEC for [M+H]+ = 287); **c** Does not appear in TIC but appears in IEC for [M+H]+ = 355).
